# Supplementary material
Source: publisher figshare collection journal article supplement (https://acs.figshare.com/ndownloader/files/4525651)

# **THE IMPORTANCE OF USING COMPLEMENTARY PROCESS ANALYZERS FOR THE PROCESS MONITORING, ANALYSIS AND UNDERSTANDING OF FREEZE DRYING**

De Beer, T.R.M.<sup>1\*</sup>; Wiggernhorn, M.<sup>2</sup>; Veillon, R.<sup>3</sup>; Debacq, C.<sup>3</sup>; Mayeresse, Y.<sup>3</sup>; Moreau, B.<sup>3</sup>;  
Burggraeve, A.<sup>1</sup>; Quinten, T.<sup>4</sup>; Frieß, W.<sup>2</sup>; Winter, G.<sup>2</sup>; Vervaet, C.<sup>4</sup>; Remon, J.P.<sup>4</sup>; Baeyens, W.R.G.<sup>1</sup>

## **SUPPORTING INFORMATION**

<sup>1</sup>Laboratory of Drug Analysis, Department of Pharmaceutical Analysis, Ghent University,  
Harelbekestraat 72, B-9000 Gent, Belgium

<sup>2</sup>Department Pharmacy, Pharmaceutical Technology and Biopharmaceutics, Ludwig-Maximilians-  
University, Butenandtstraße 5 – Building B, D-81377 Munich, Germany

<sup>3</sup>GSK Biologicals, Freeze drying department, Rue de l'Institut 89, B-1330 Rixensart, Belgium

<sup>4</sup>Laboratory of Pharmaceutical Technology, Department of Pharmaceutics, Ghent University,  
Harelbekestraat 72, B-9000 Gent, Belgium

**Supporting Information Figures: 6 (figure S-1 to figure S-4)**

**Figure S-1.** The product temperature plateau due to mannitol crystallization during the freezing step can be better monitored using the wireless temperature sensors when higher concentrations are freeze dried.

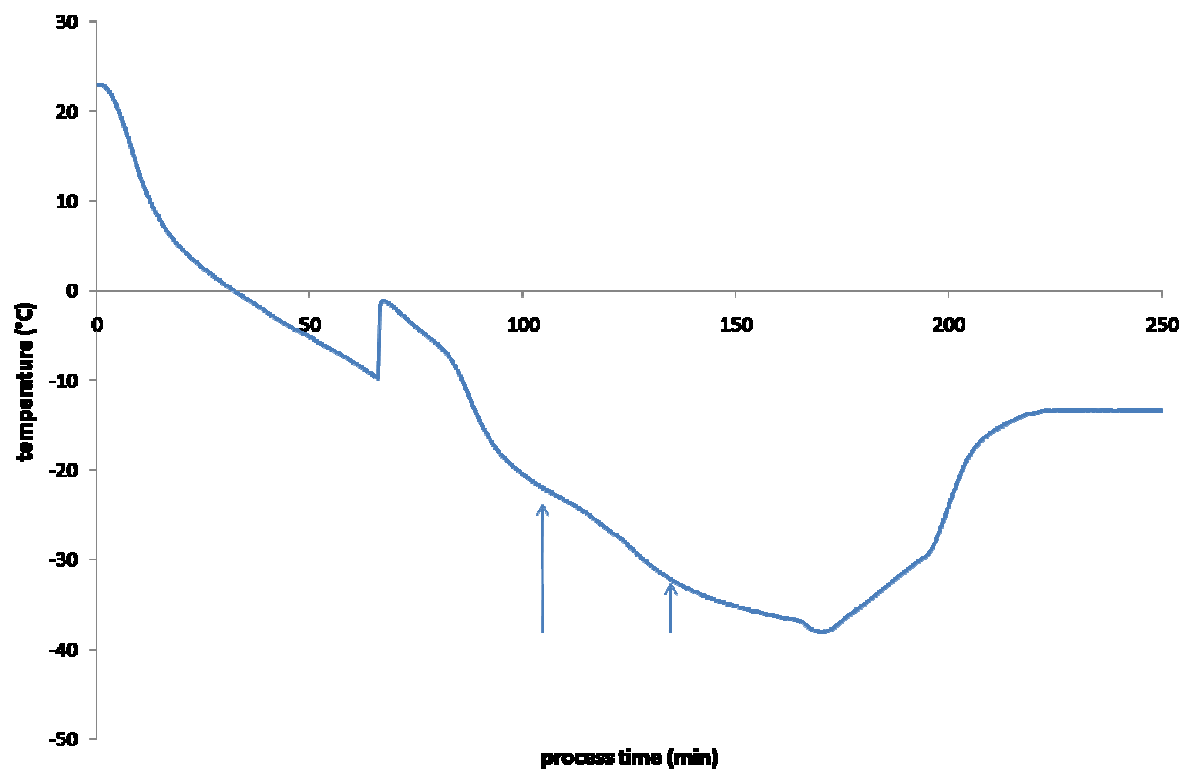

**Figure S-2.** Peak intensity of Raman ice band ( $215\text{ cm}^{-1}$ ) versus process time during experiment 1.

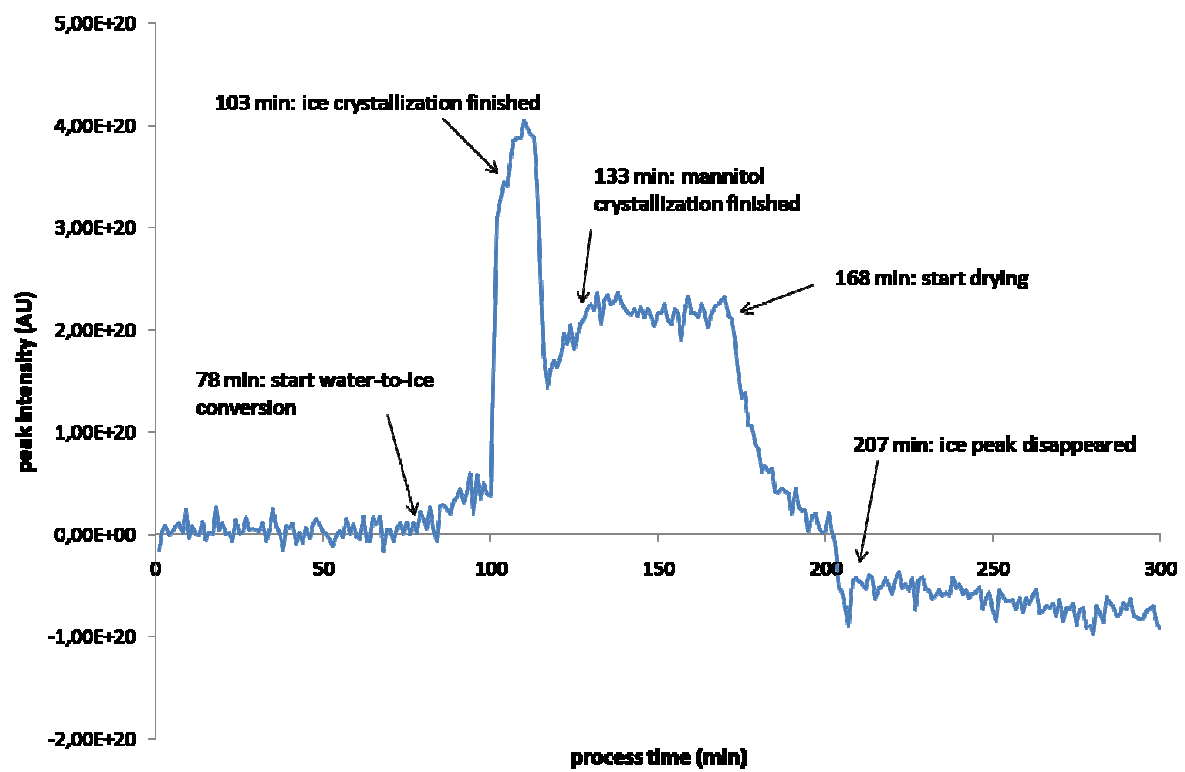

**Figure S-3a.** PCA result for the NIR data ( $4466\text{--}7243\text{ cm}^{-1}$ ) obtained during the freezing step: scores for PC 1 versus process time plot. PC 1 capture 98.17 % of total spectral variance.

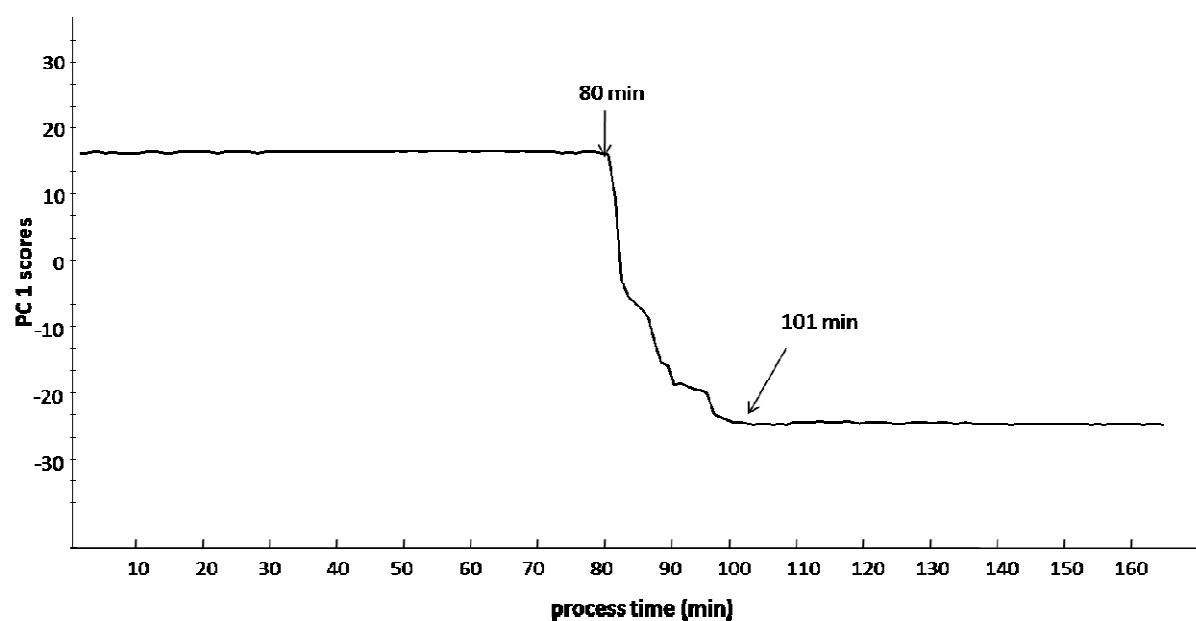

**Figure S-3b.** Difference between NIR spectra containing ice without crystalline mannitol (spectra collected before 136 min) and NIR spectra containing ice and crystalline mannitol (spectra collected after 136 min).

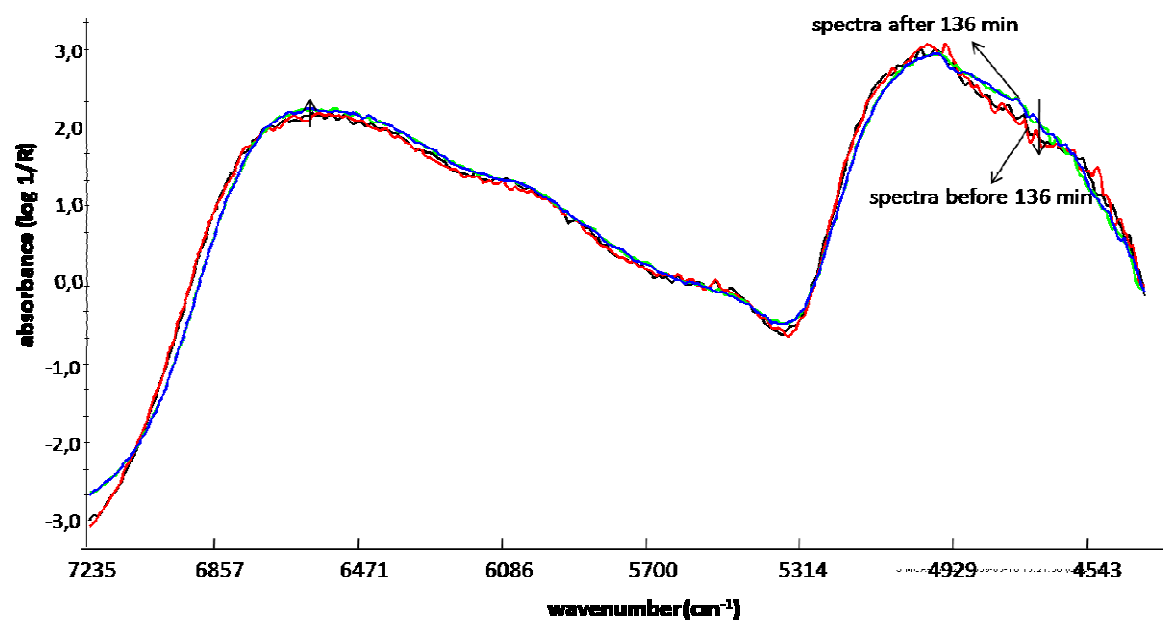

**Figure S-4a.** Raman spectral changes during secondary drying (1800 – 2300 min, experiment 3): transformation from mannitol hemi-hydrate to  $\alpha$ -mannitol.

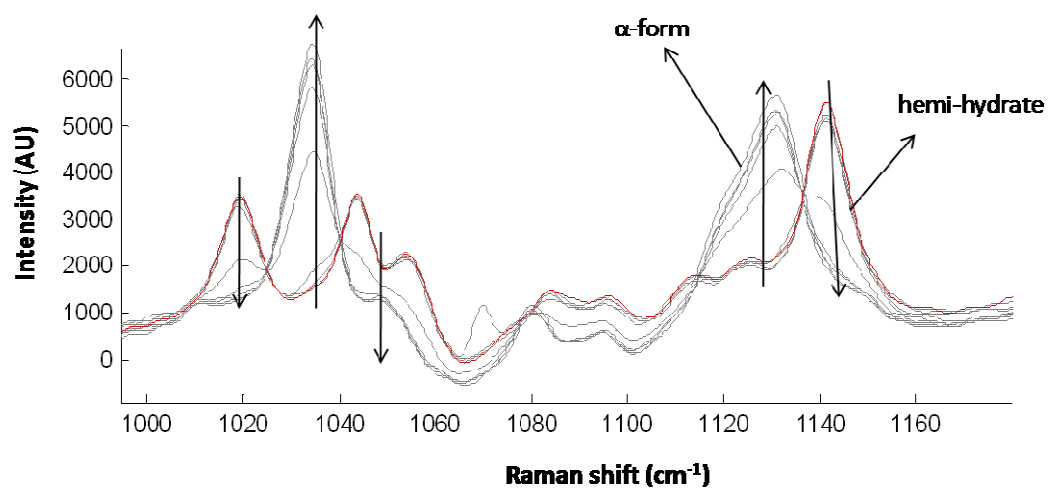

**Figure S-4b.** NIR spectra (second derivatives) collected during secondary drying of experiment 3 (5319 – 5050  $\text{cm}^{-1}$ ).

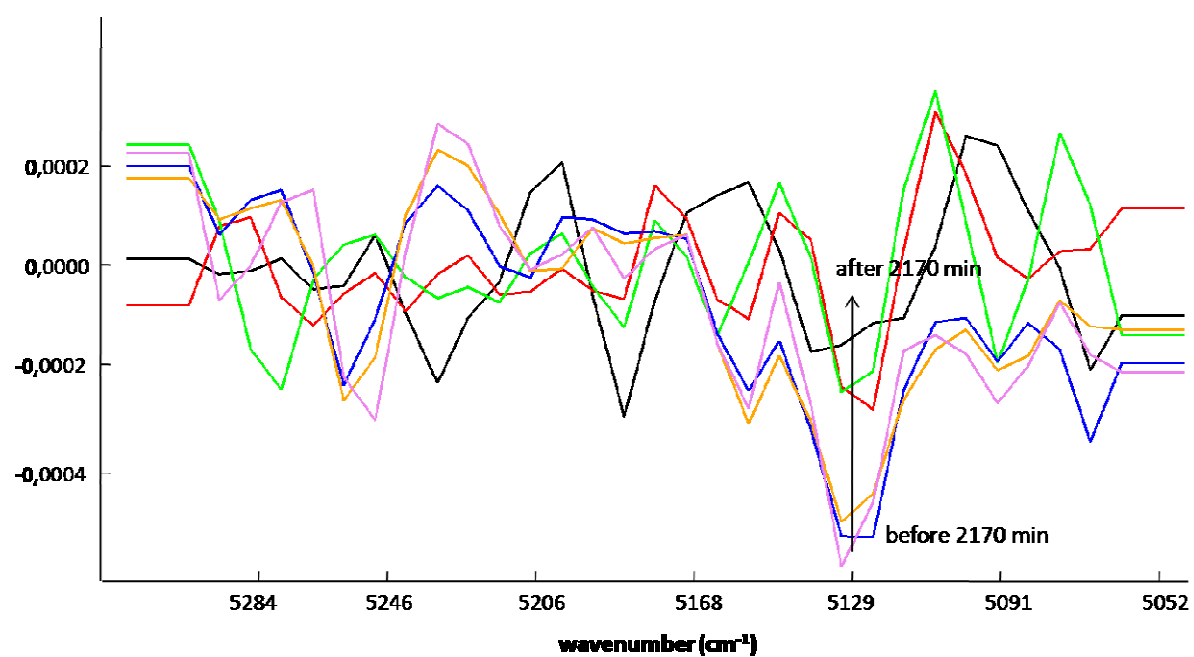

Supplement: Supplementary file 1 [file 4525651]
